# Supplementary material for: Aerosol optical depth climatology from the high-resolution MAIAC product over Europe: differences between major European cities and their surrounding environments
Source: Copernicus journal article supplement (doi:10.5194/acp-23-12455-2023), 2023-10-06
Supplement: Supplementary file 1 [file acp-23-12455-2023-supplement.pdf]

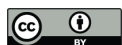

*Supplement of*

## **Aerosol optical depth climatology from the high-resolution MAIAC product over Europe: differences between major European cities and their surrounding environments**

**Ludovico Di Antonio et al.**

*Correspondence to:* Ludovico Di Antonio ([ludovico.diantonio@lisa.ipsl.fr](mailto:ludovico.diantonio@lisa.ipsl.fr)) and Matthias Beekmann ([matthias.beekmann@lisa.ipsl.fr](mailto:matthias.beekmann@lisa.ipsl.fr))

The copyright of individual parts of the supplement might differ from the article licence.

Supplementary

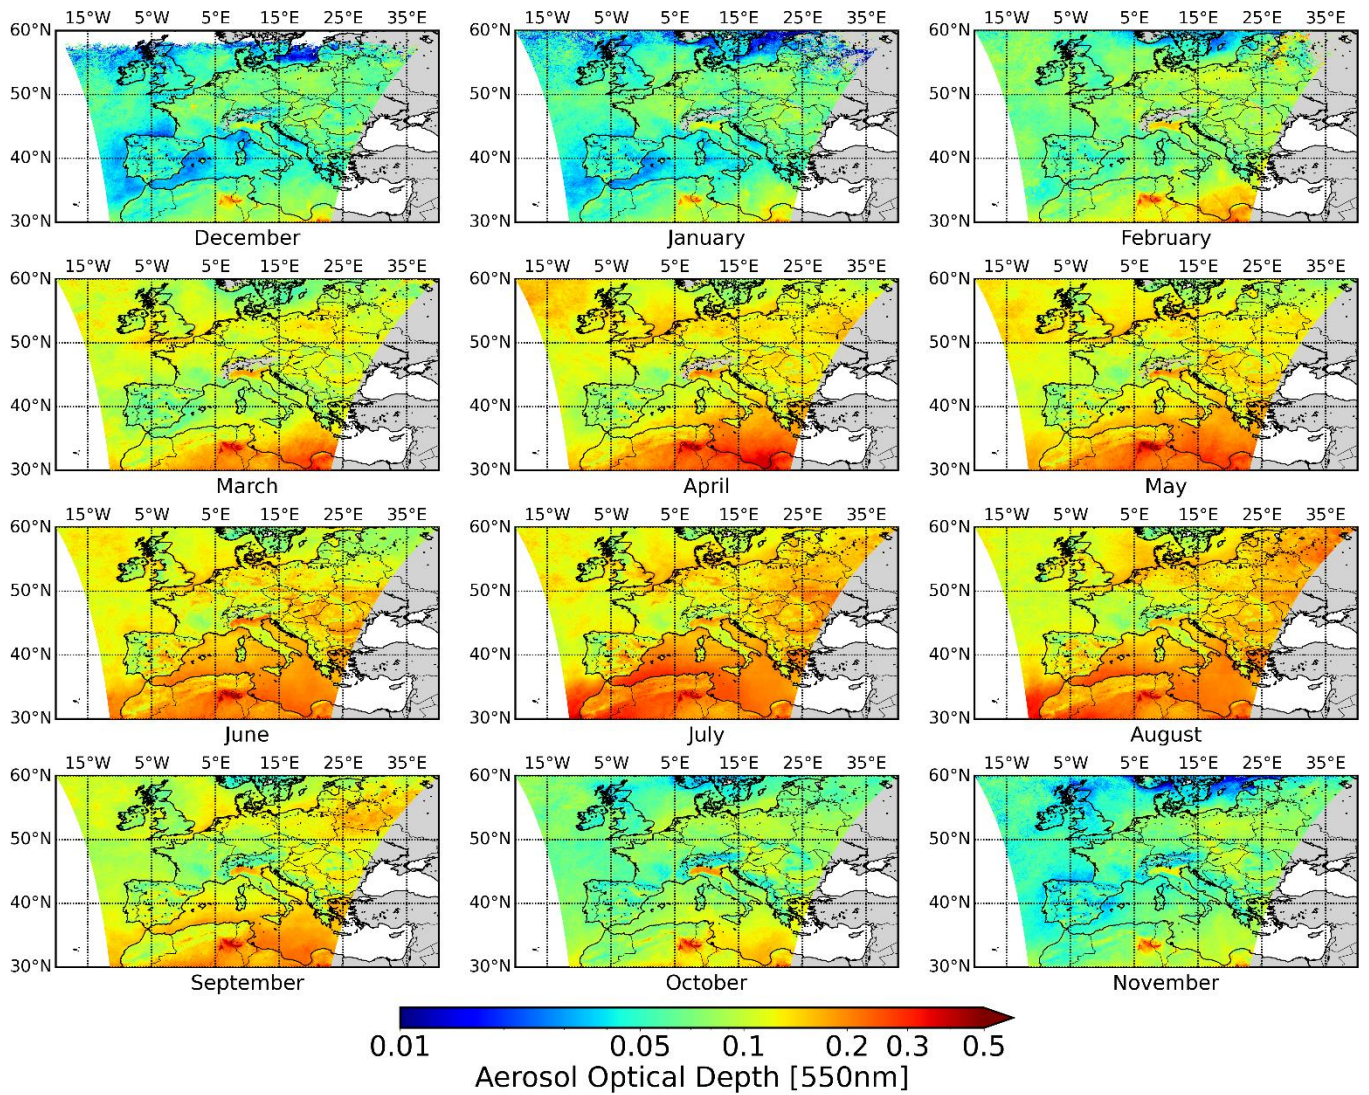

Figure S1: Climatological monthly mean of the Aerosol Optical Depth at 550 nm over the period 2000–2021.

5

10

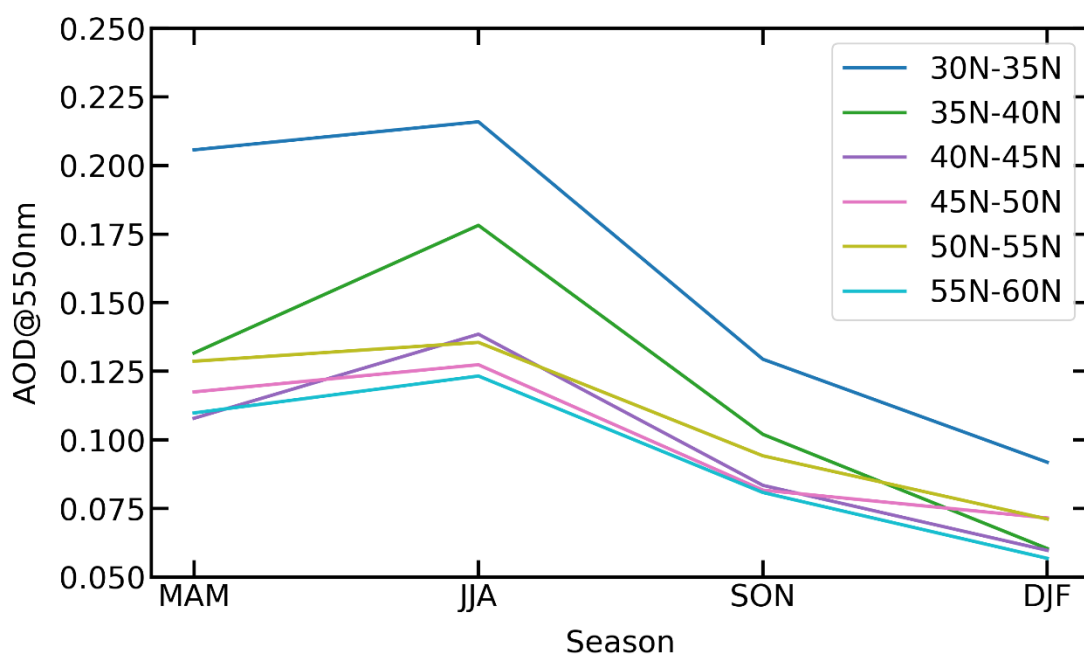

**Figure S2: Seasonal and latitudinal climatological averages of Aerosol Optical Depth at 550 nm from the MAIAC product.**

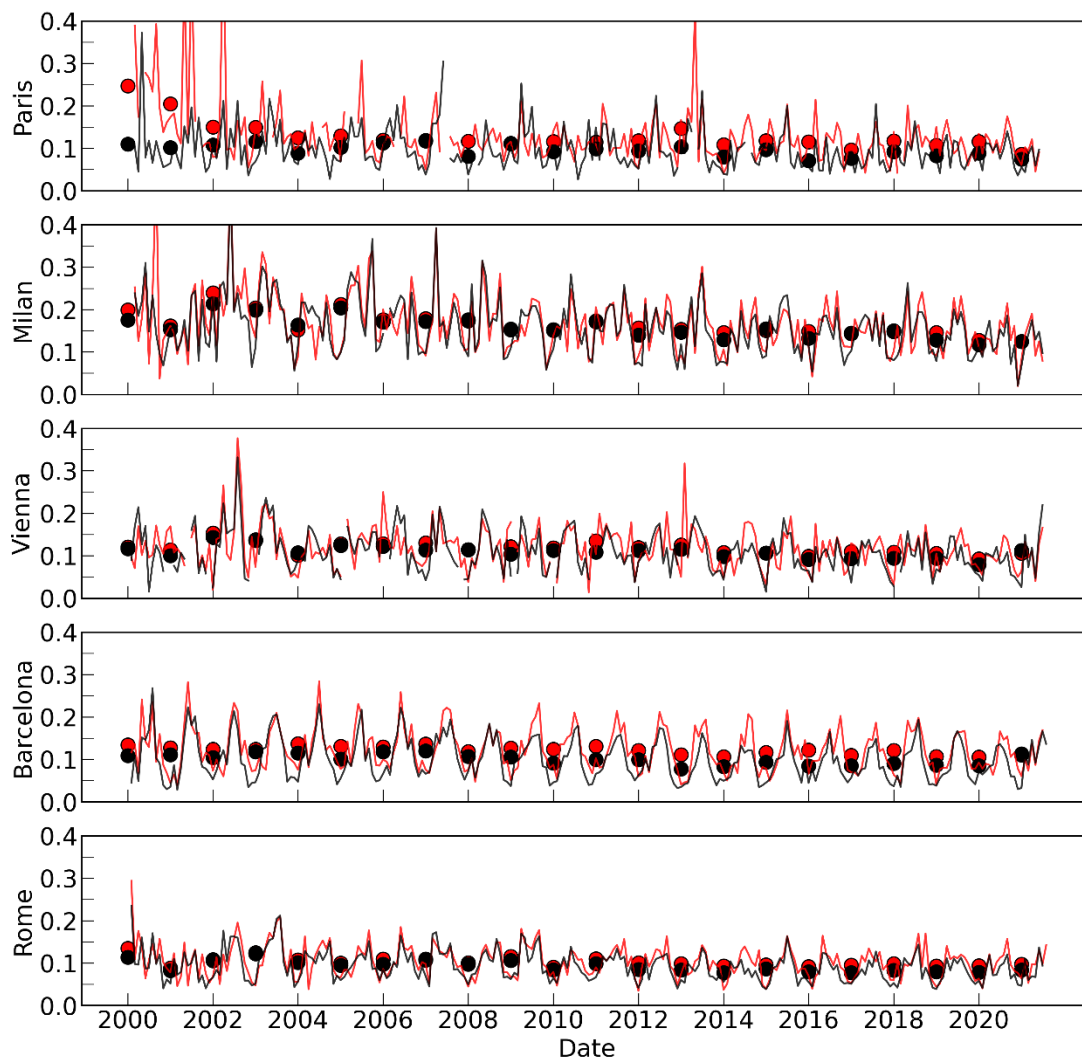

— Local - monthly mean      — Regional - monthly mean  
 ● Local - yearly mean      ● Regional - yearly mean

**Figure S3: Time series of monthly and yearly local and regional Aerosol Optical Depth at 550 nm from the MAIAC product for five different cities: Paris, Milan, Vienna, Barcelona, Rome.**
